# Supplementary material for: Molecular Signatures of Membrane Protein Complexes Underlying Muscular Dystrophy
Source: PubMed Central journal article supplement (PMC5083101; doi:10.1074/mcp.m116.059188), 2016-04-20

## Cluster K5

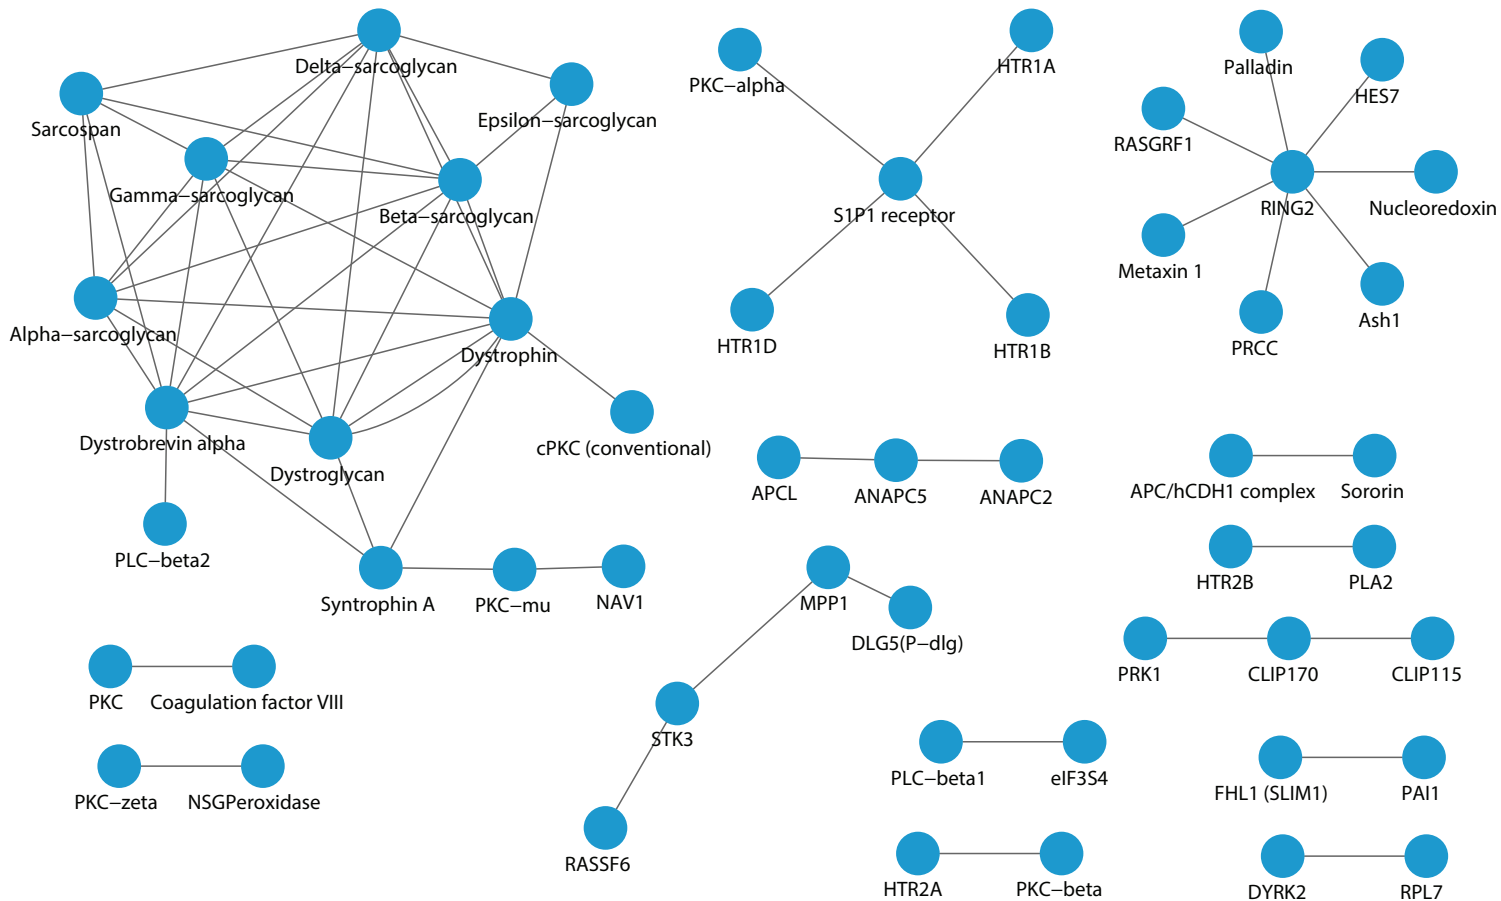

## Cluster K6

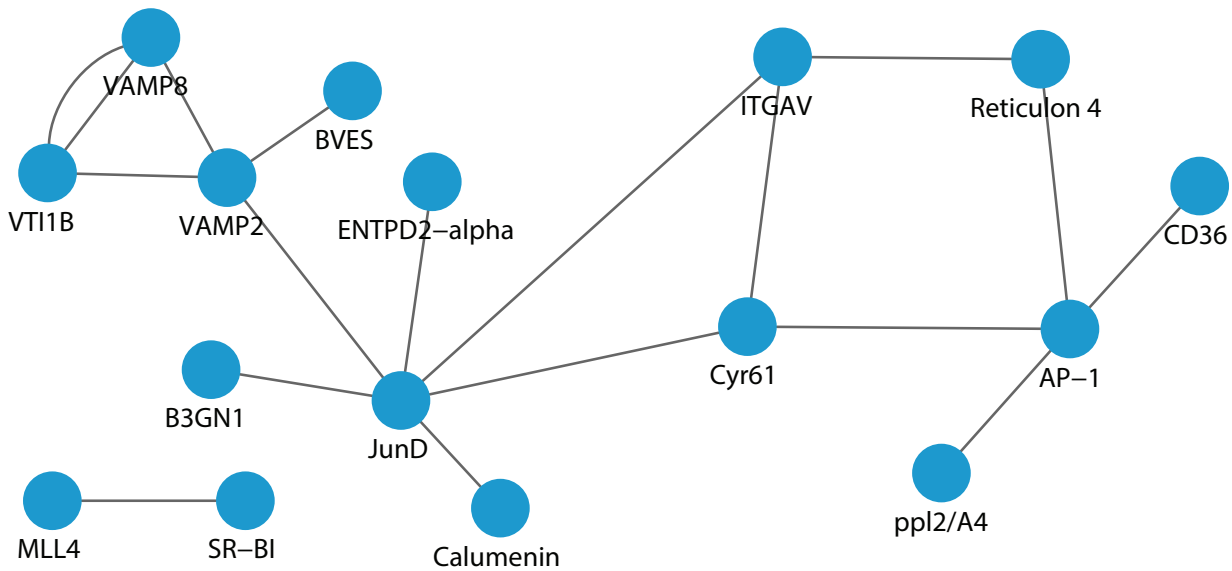

### Cluster K7

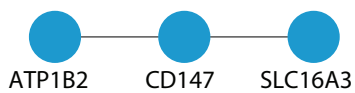

### Cluster K8

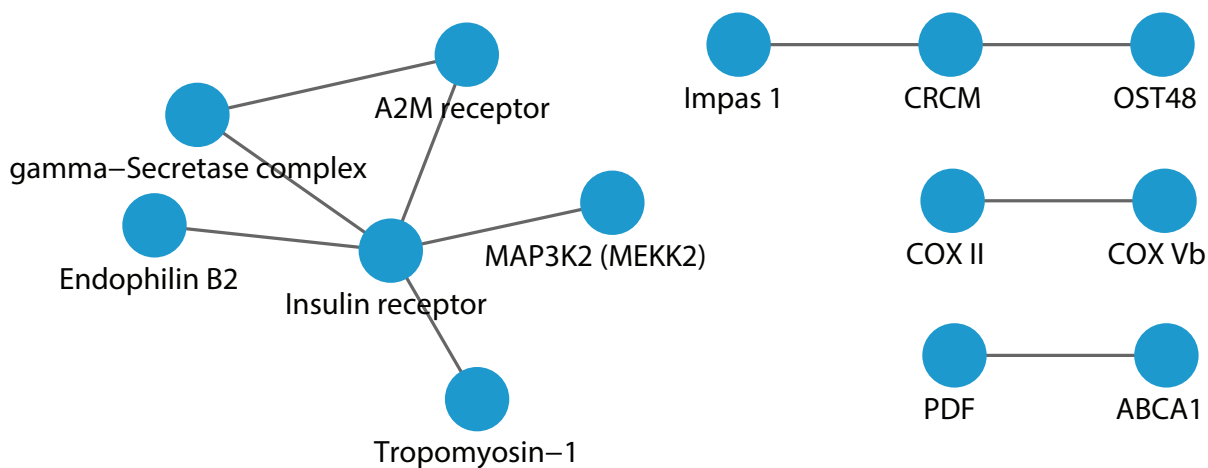

### Cluster K9

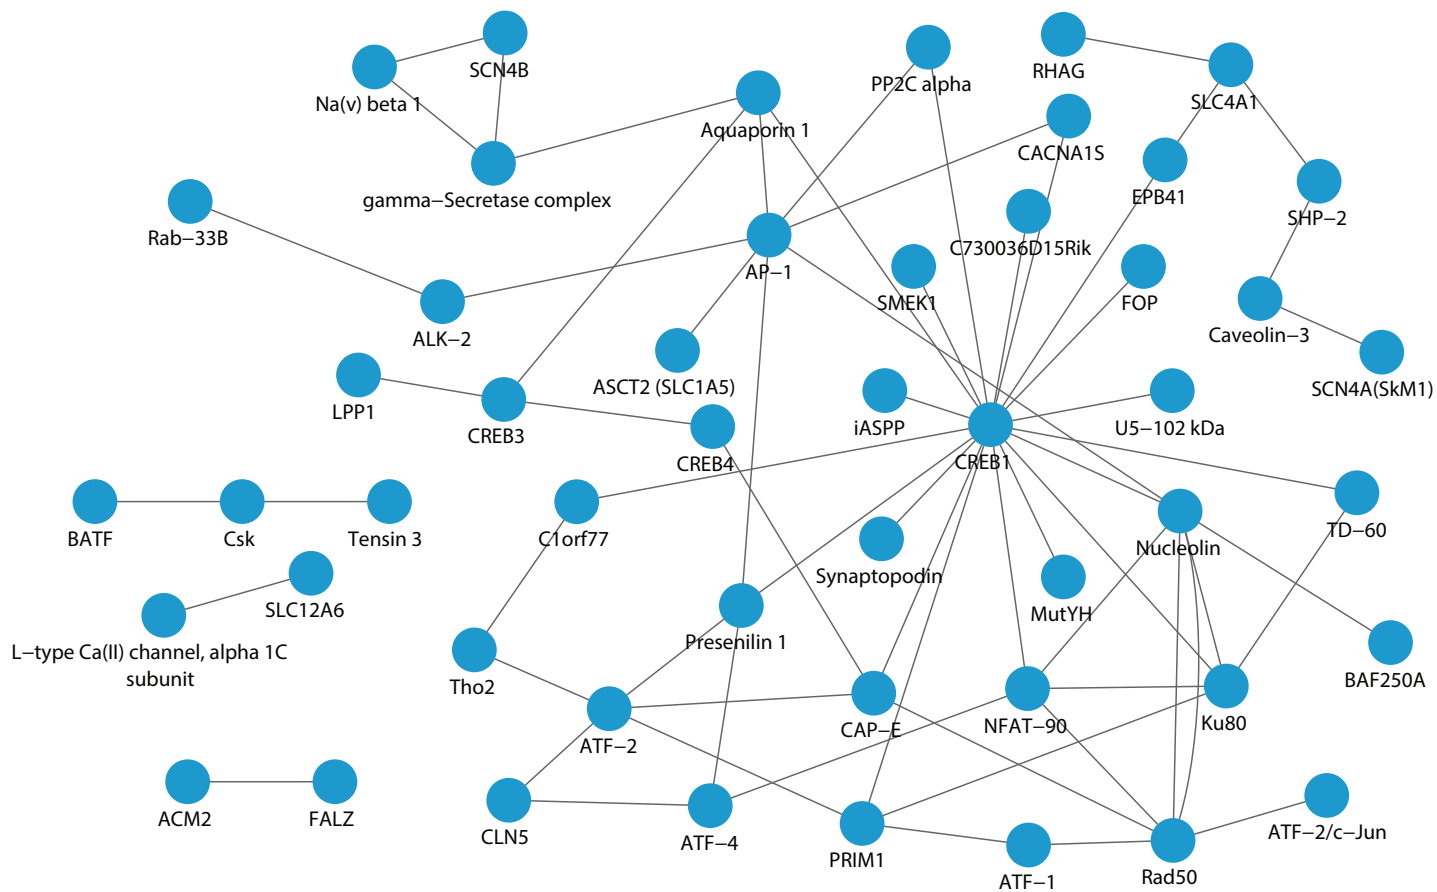



# Cluster K11

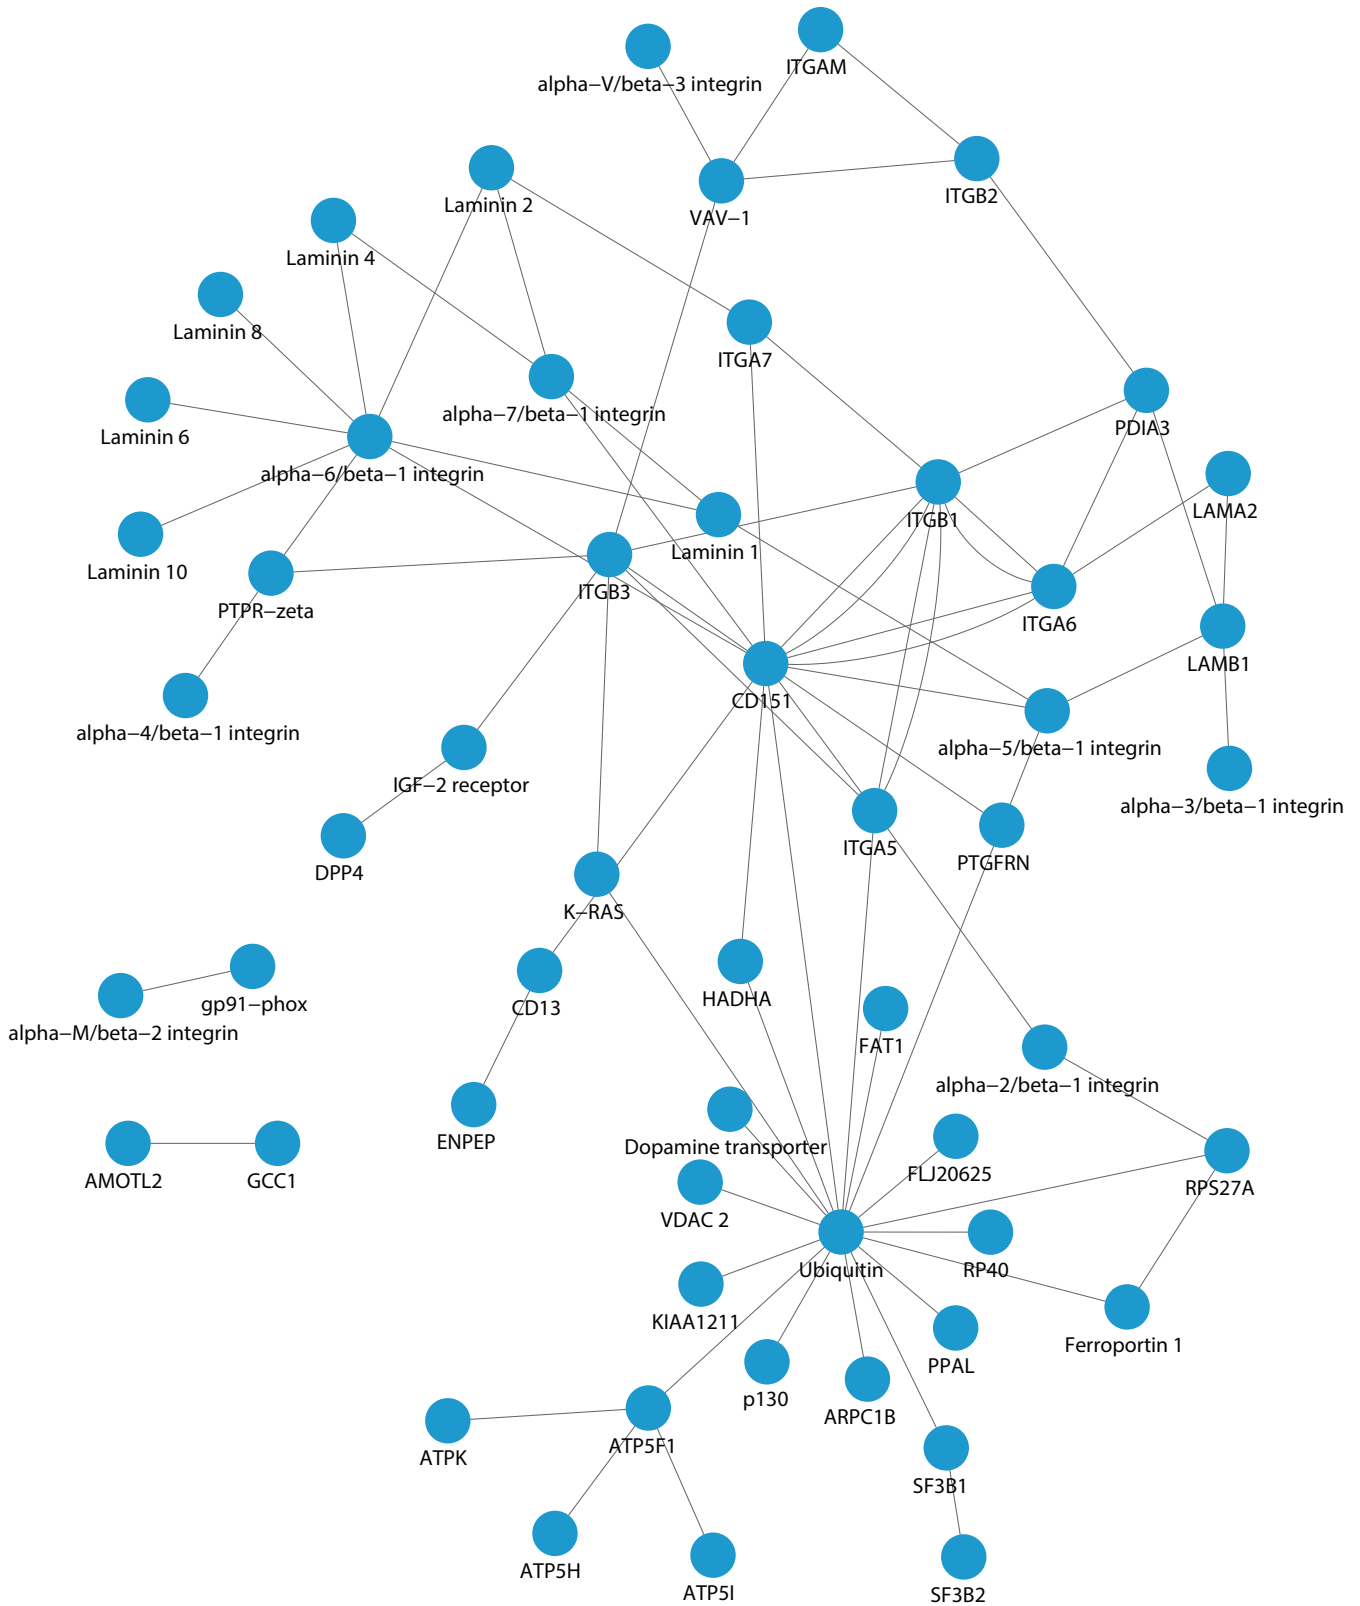

# Cluster K12

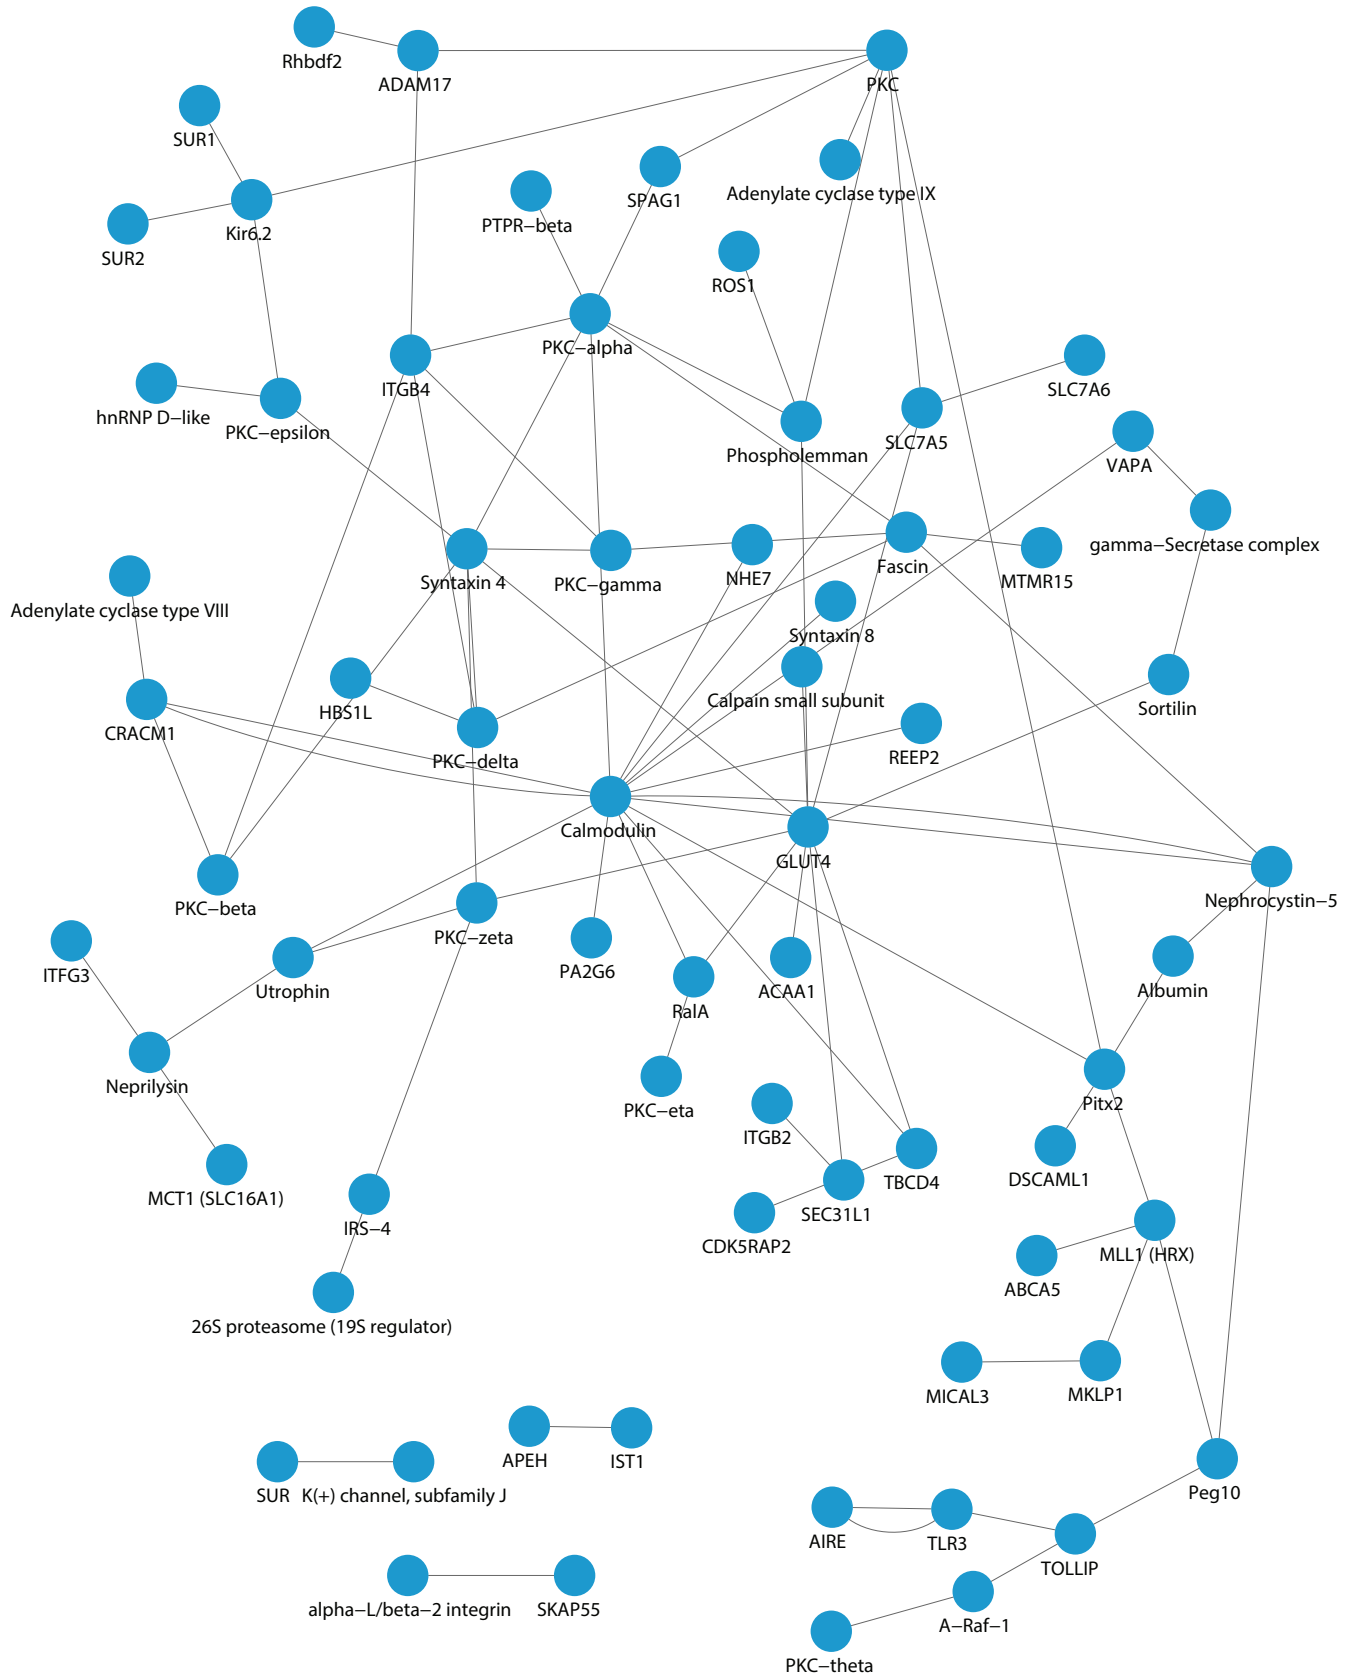

# Cluster K13

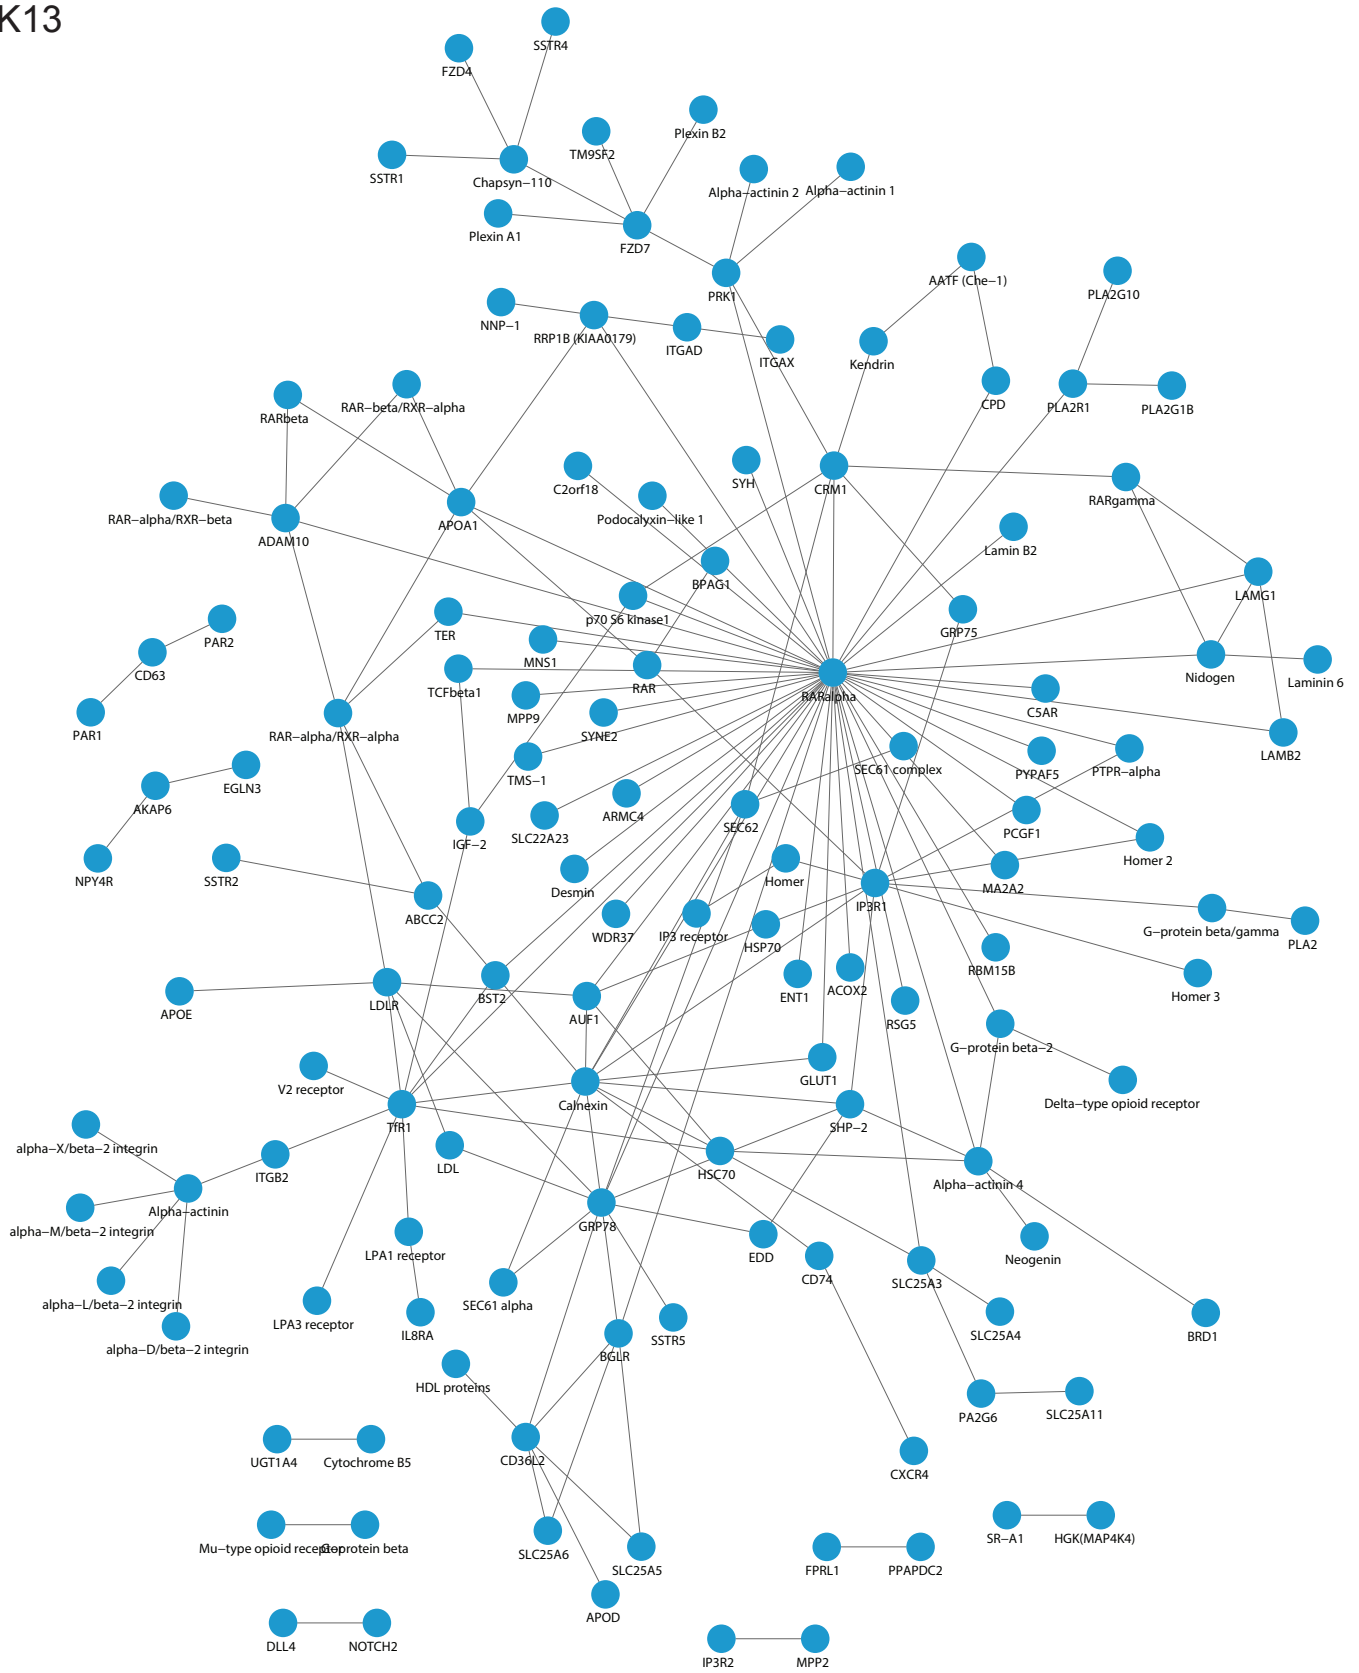

# Cluster K14

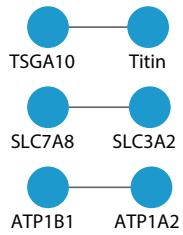

Supplement: 10.1074_M116.059188_mcp.M116.059188-3.pdf [file 10.1074_M116.059188_mcp.M116.059188-3.pdf]
