# Supplementary material for: Molecular Signatures of Membrane Protein Complexes Underlying Muscular Dystrophy
Source: PubMed Central journal article supplement (PMC5083101; doi:10.1074/mcp.m116.059188), 2016-04-20

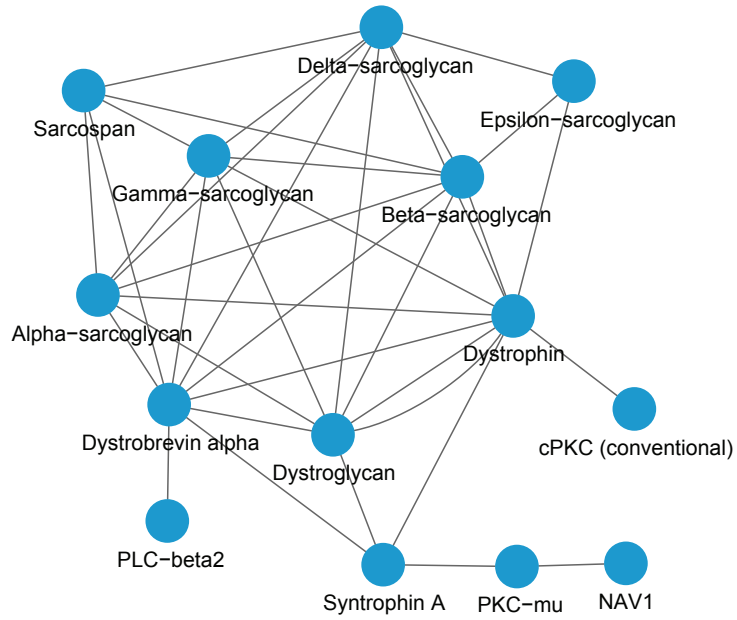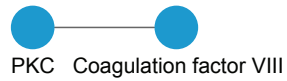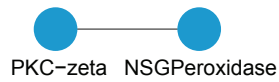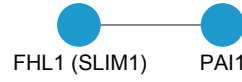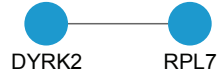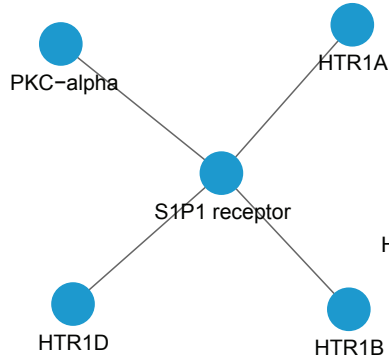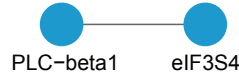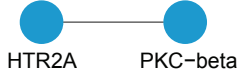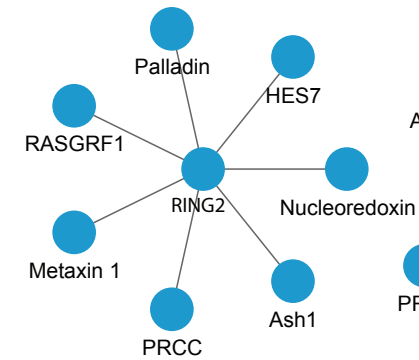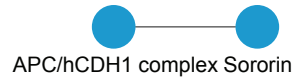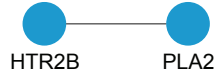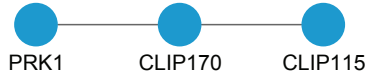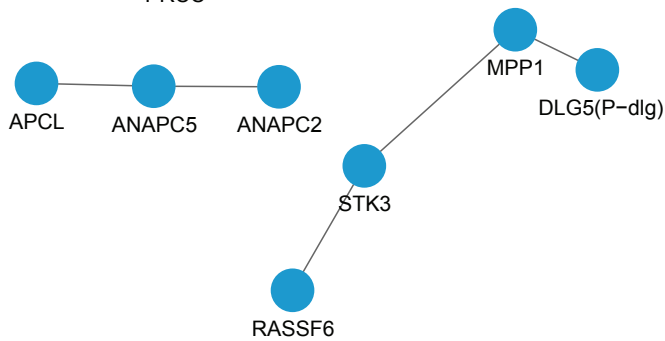

Supplement: 10.1074_M116.059188_mcp.M116.059188-5.pdf [file 10.1074_M116.059188_mcp.M116.059188-5.pdf]
